# Supplementary material for: Development of Lomustine and n-Propyl Gallate Co-Encapsulated Liposomes for Targeting Glioblastoma Multiforme via Intranasal Administration
Source: MDPI journal article supplement (doi:10.3390/pharmaceutics14030631), 2022-03-12
Supplement: s1 [file s1]

# Supplementary material: Development of Lomustine and *n*-Propyl Gallate Co-encapsulated Liposomes for Targeting Glioblastoma Multiforme via Intranasal Administration

Gábor Katona <sup>1,\*†</sup>, Fakhara Sabir <sup>1,†</sup>, Bence Sipos<sup>1</sup>, Muhammad Naveed<sup>3</sup>, Zsuzsanna Schelz <sup>2</sup>, István Zupkó <sup>2</sup> and Ildikó Csóka <sup>1</sup>

<sup>1</sup> Institute of Pharmaceutical Technology and Regulatory Affairs, Faculty of Pharmacy, University of Szeged, Eötvös Str. 6, H-6720 Szeged, Hungary; katona.gabor@szte.hu (G.K.); fakhra.sabir@gmail.com (F.S.); sipos.bence@szte.hu (B.S.); csoka.ildiko@szte.hu (I.C.)

<sup>2</sup> Department of Pharmacodynamics and Biopharmacy, Faculty of Pharmacy, University of Szeged, Eötvös Str. 6, H-6720 Szeged, Hungary; schelz.zsuzsanna@szte.hu (Z.S.); zupko@pharm.u-szeged.hu (I.Z.);

<sup>3</sup> Department of Pharmacology and Pharmacotherapy, Faculty of Medicine, University of Szeged, Dóm sqr. 12; H-6720 Szeged, Hungary; naveed.muhammad@med.u-szeged.hu (M.N.)

\* Correspondence: katona.gabor@szte.hu; Tel.: +36-62-545-575

† These authors contribute equally to this paper.

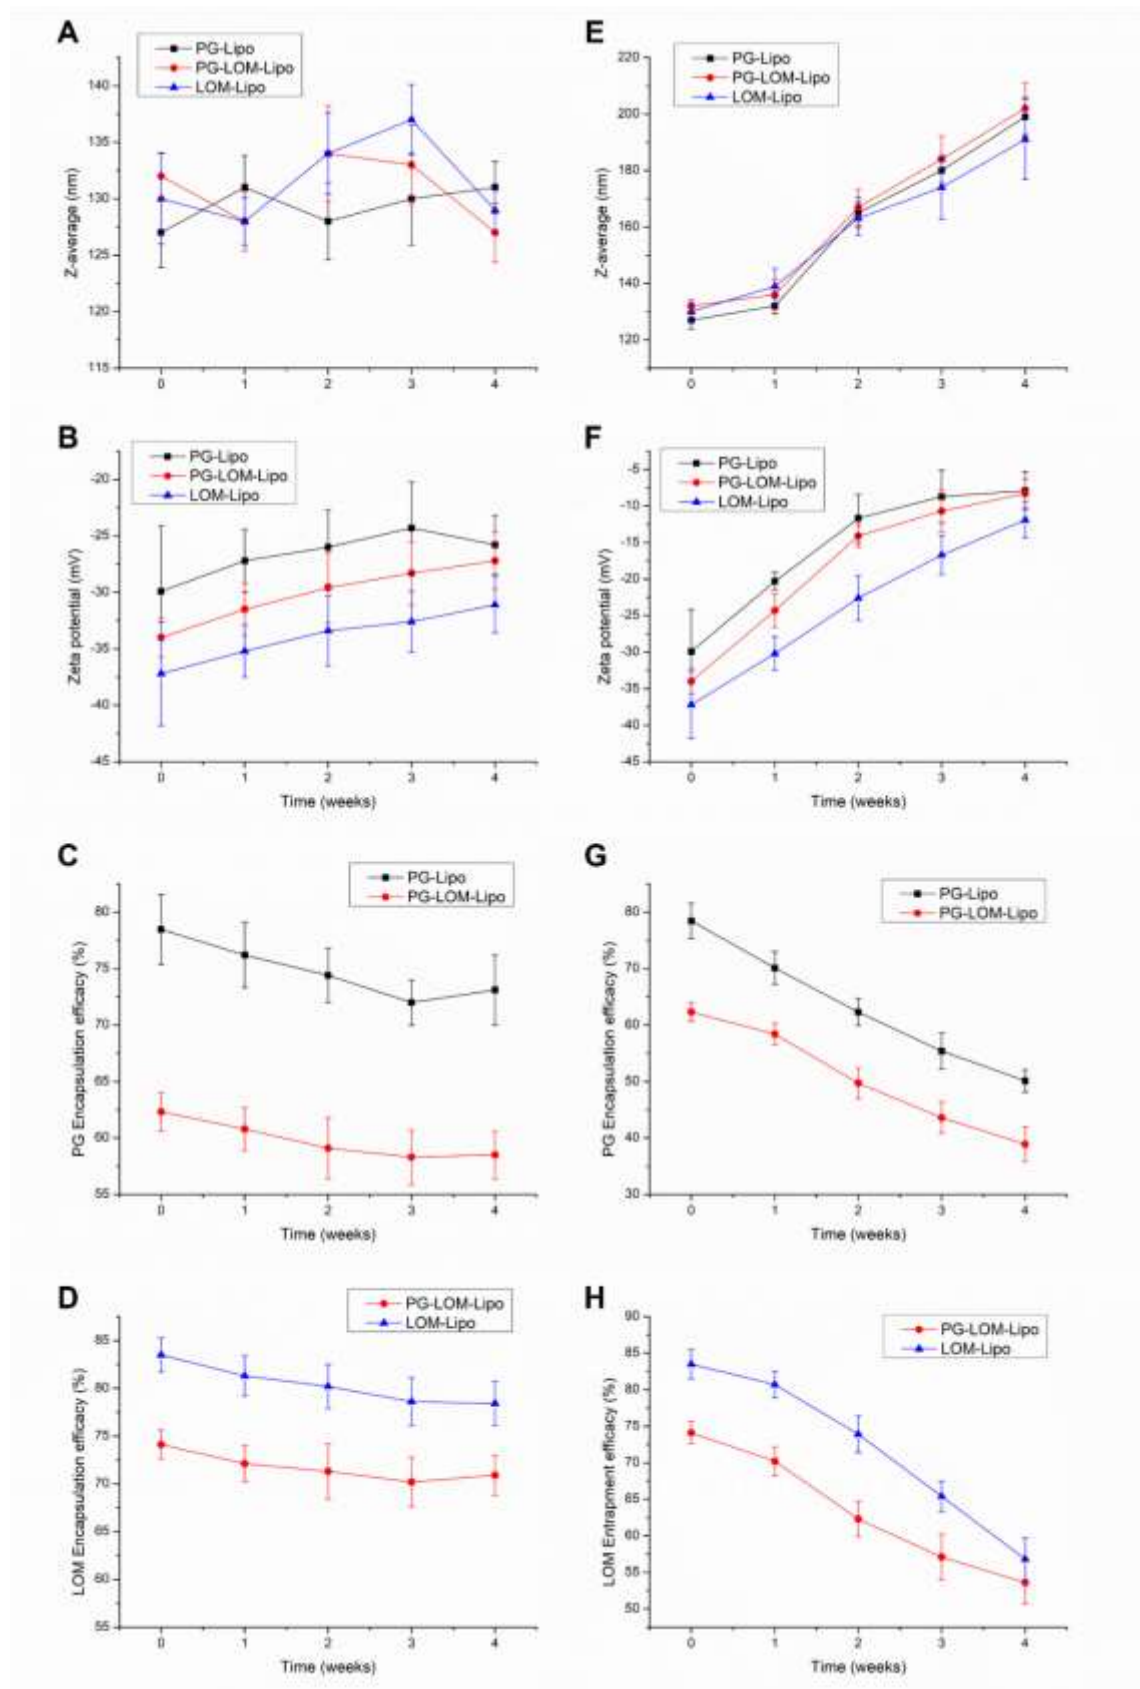

**Figure S1.** Stability of liposomal formulations evaluated at different temperatures; 4 °C (A-D) and room temperature (25 °C) (E-H) expressed as Z-average (A and E), zeta potential (B and F), and EE regarding to PG (C and G) and LOM (D and H) over period of four weeks.
